# Supplementary material
Source: PubMed Central journal article supplement (PMC3418633)

# Supplementary figure 1

## Pain threshold

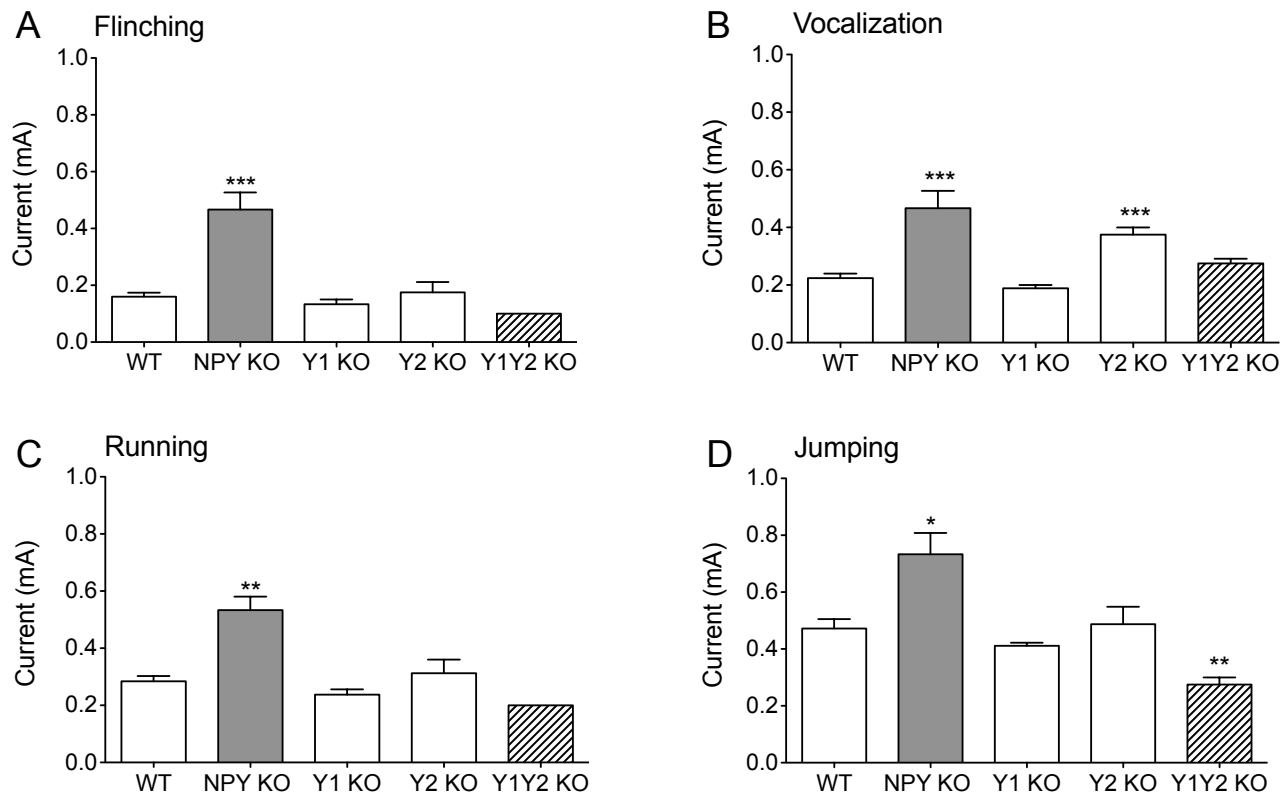

Supplement: bph0166-1461-SD1.pdf [file bph0166-1461-SD1.pdf]

## Supplementary figure 2

### Fear acquisition (CS-)

#### A NPY KO

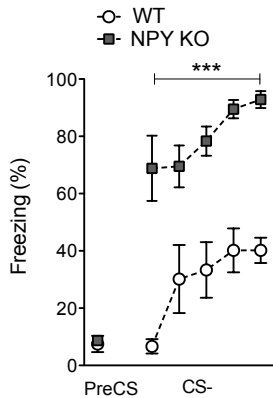

#### B Y1 KO

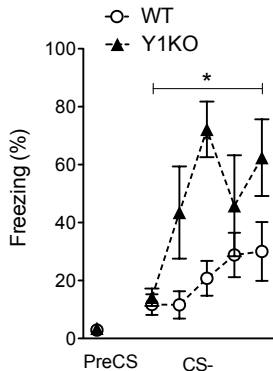

#### C Y2 KO

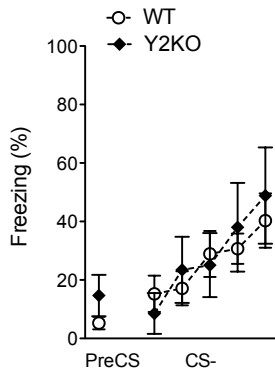

#### D Y1Y2 KO

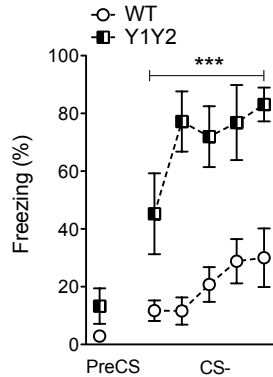

Supplement: bph0166-1461-SD2.pdf [file bph0166-1461-SD2.pdf]
